# Supplementary material for: Mechanistic alternatives for peptide bond formation on the ribosome
Source: PubMed Central journal article supplement — Nucleic Acids Res. 2018 May 9;46(11):5345–54. doi: 10.1093/nar/gky367 (PMC6009655; doi:10.1093/nar/gky367), 2018-05-09
Supplement: gky367_supplemental_figures.pdf [file gky367_supplemental_figures.pdf]

## Supplementary Figures

### Mechanistic alternatives for peptide bond formation on the ribosome

*Masoud Kazemi<sup>†‡</sup>, Jaka Sočan<sup>†</sup>, Fahmi Himo<sup>‡\*</sup>, Johan Åqvist<sup>†\*</sup>*

<sup>†</sup>Department of Cell and Molecular Biology, Box 596, Uppsala University, BMC, SE-751 24  
Uppsala, Sweden

<sup>‡</sup>Department of Organic Chemistry, Arrhenius Laboratory, Stockholm University, SE-106 91  
Stockholm, Sweden

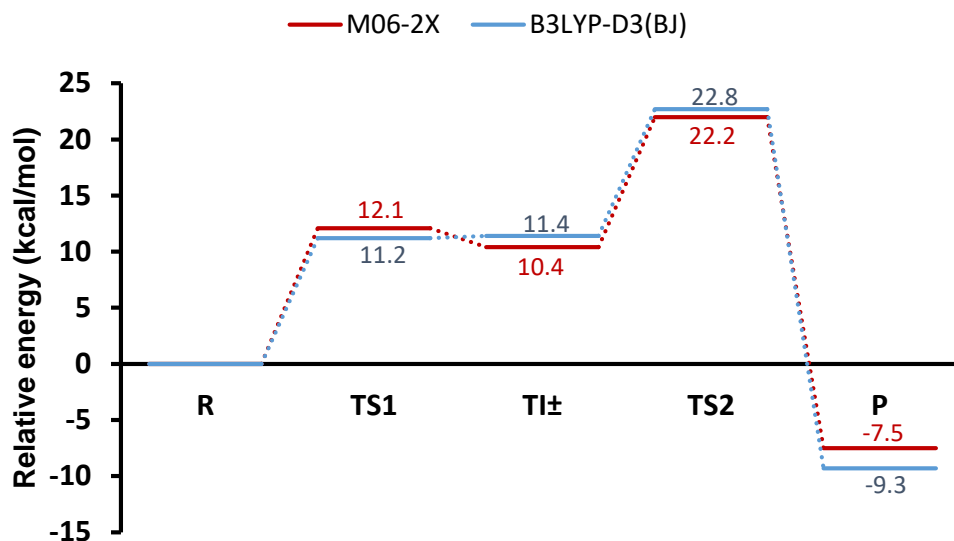

**Figure S1.** Calculated energetics of the proton shuttle mechanism involving a ten-membered transition state with M06-2X and B3LYP functionals.

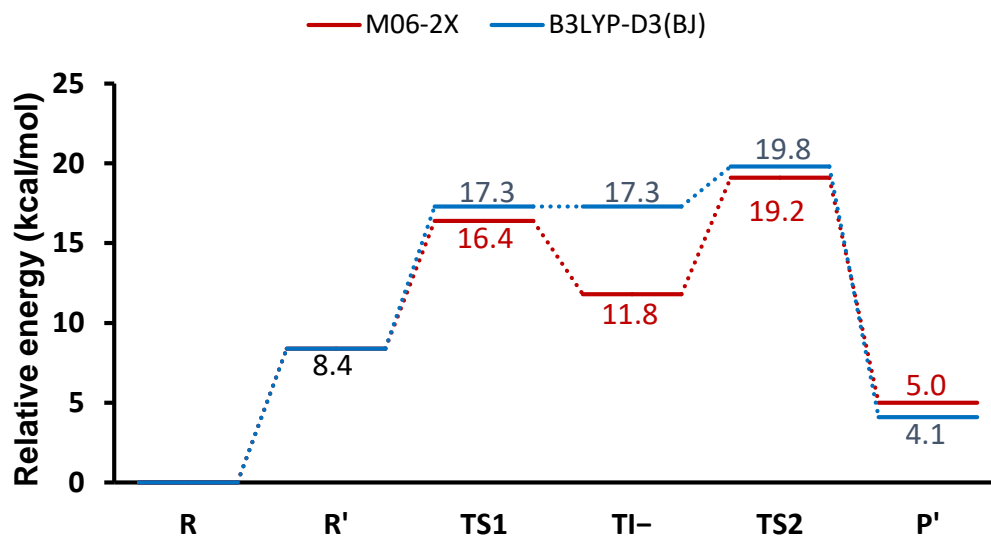

**Figure S2.** Calculated energetics of the general base catalyzed mechanism with M06-2X and B3LYP functionals.
